# Supplementary material for: 3D U-Net for automated detection of multiple sclerosis lesions: utility of transfer learning from other pathologies
Source: PubMed Central journal article supplement (PMC10641790; doi:10.3389/fnins.2023.1188336), 2023-10-27
Supplement: Image_3.pdf [file Image_3.pdf]

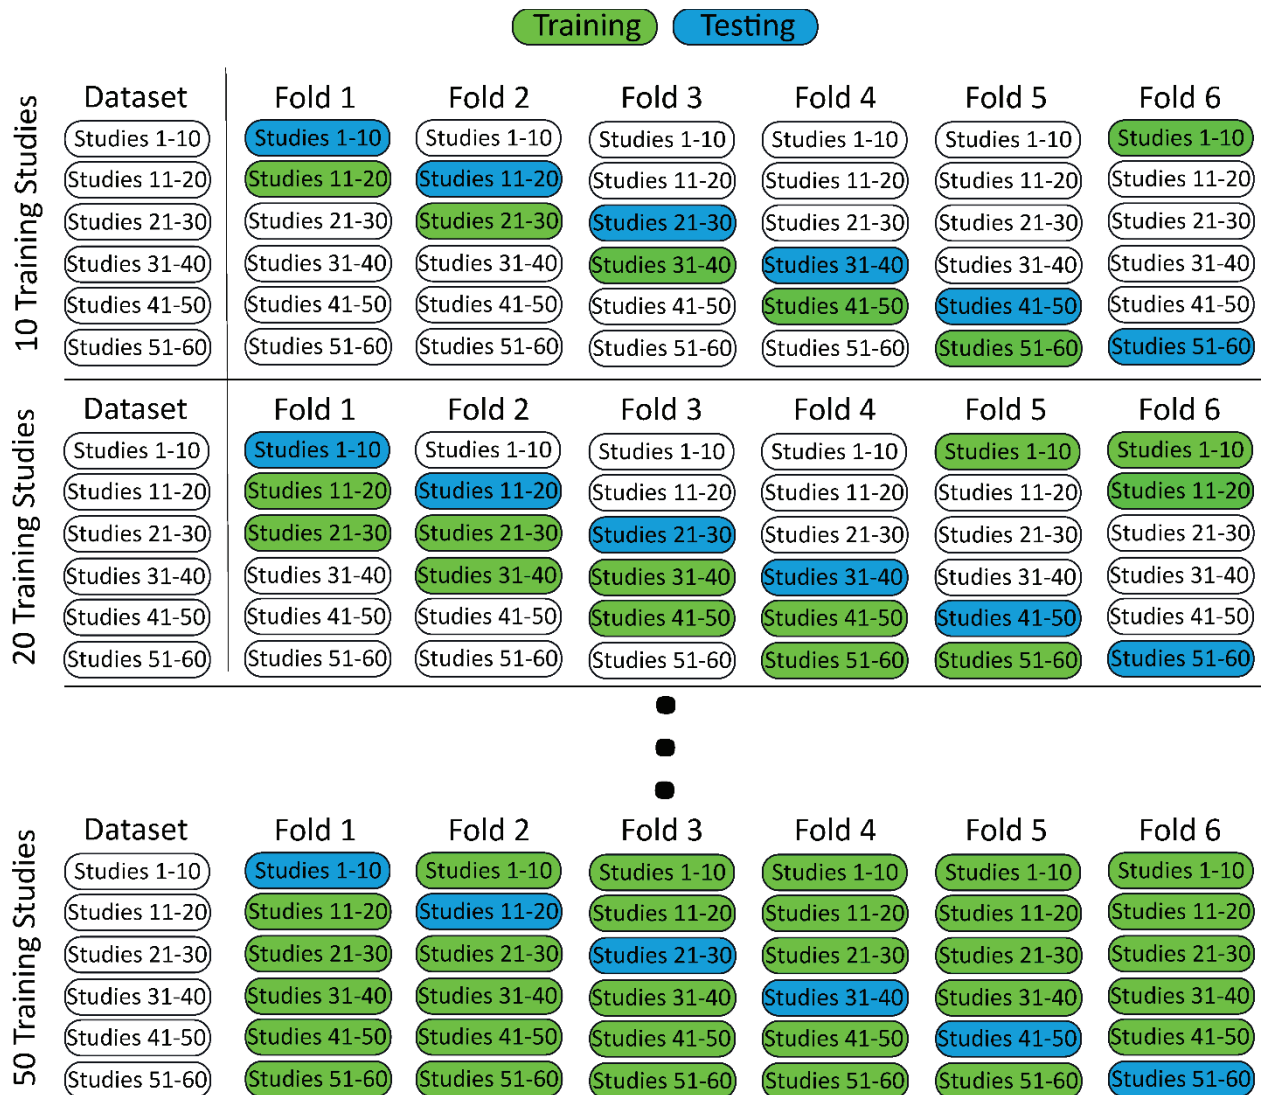

**Supplementary Figure 3:** Graphical depiction of 6-fold cross-validation approach. The 60 study dataset is divided into subsets of 10 studies. Each fold uses 1-5 subsets for training (labelled in green) and 1 subset for testing (labelled in blue).
