# Supplementary material for: 3D U-Net for automated detection of multiple sclerosis lesions: utility of transfer learning from other pathologies
Source: PubMed Central journal article supplement (PMC10641790; doi:10.3389/fnins.2023.1188336), 2023-10-27
Supplement: Table_1.pdf [file Table_1.pdf]

| Model          | Training Method | Lesionwise Sensitivity | p <sup>Default</sup> | p <sup>Method</sup> | Lesionwise PPV | p <sup>Default</sup> | p <sup>Method</sup> |
|----------------|-----------------|------------------------|----------------------|---------------------|----------------|----------------------|---------------------|
| <b>Default</b> |                 | 0.30±0.04              |                      |                     | 0.93±0.04      |                      |                     |
| <b>10</b>      | FT              | 0.52±0.02              | <0.001*              | 0.252               | 0.68±0.02      | <0.001*              | <0.001*             |
|                | DN              | 0.49±0.01              | <0.001*              |                     | 0.35±0.02      | <0.001*              |                     |
| <b>20</b>      | FT              | 0.55±0.02              | <0.001*              | 0.002*              | 0.70±0.03      | <0.001*              | <0.001*             |
|                | DN              | 0.50±0.02              | <0.001*              |                     | 0.51±0.03      | <0.001*              |                     |
| <b>30</b>      | FT              | 0.58±0.02              | <0.001*              | 0.028               | 0.72±0.02      | <0.001*              | <0.001*             |
|                | DN              | 0.54±0.02              | <0.001*              |                     | 0.55±0.02      | <0.001*              |                     |
| <b>40</b>      | FT              | 0.61±0.02              | <0.001*              | 0.017               | 0.70±0.02      | <0.001*              | <0.001*             |
|                | DN              | 0.57±0.02              | <0.001*              |                     | 0.58±0.02      | <0.001*              |                     |
| <b>50</b>      | FT              | 0.61±0.02              | <0.001*              | 0.059               | 0.68±0.03      | <0.001*              | <0.001*             |
|                | DN              | 0.58±0.01              | <0.001*              |                     | 0.59±0.02      | <0.001*              |                     |

**Supplementary Table 1:** Single timepoint FLAIR segmentation model performance with alternate shallow U-Net architecture. All sensitivity and PPV values are displayed as mean ± standard error. FT = fine-tuned, DN = de-novo, PPV = positive predictive value, p<sup>Default</sup> = p value from comparison with the default model, p<sup>Method</sup> = p value from comparison between fine-tuned and de-novo training methods with the same training dataset size. \* indicates statistical significance (p<0.05 after accounting for Bonferroni correction).
