# Supplementary material for: 3D U-Net for automated detection of multiple sclerosis lesions: utility of transfer learning from other pathologies
Source: PubMed Central journal article supplement (PMC10641790; doi:10.3389/fnins.2023.1188336), 2023-10-27
Supplement: Table_2.pdf [file Table_2.pdf]

| Model   | Training Method | Lesionwise Sensitivity | p <sup>Default</sup> | p <sup>Method</sup> | Lesionwise PPV | p <sup>Default</sup> | p <sup>Method</sup> |
|---------|-----------------|------------------------|----------------------|---------------------|----------------|----------------------|---------------------|
| Default |                 | 0.25±0.04              |                      |                     | 0.93±0.03      |                      |                     |
| 10      | FT              | 0.55±0.02              | <0.001*              | 0.769               | 0.72±0.02      | <0.001*              | <0.001*             |
|         | DN              | 0.54±0.02              | <0.001*              |                     | 0.28±0.02      | <0.001*              |                     |
| 20      | FT              | 0.59±0.02              | <0.001*              | <0.001*             | 0.73±0.02      | <0.001*              | <0.001*             |
|         | DN              | 0.50±0.01              | <0.001*              |                     | 0.45±0.03      | <0.001*              |                     |
| 30      | FT              | 0.59±0.01              | <0.001*              | <0.001*             | 0.75±0.02      | <0.001*              | <0.001*             |
|         | DN              | 0.50±0.01              | <0.001*              |                     | 0.52±0.03      | <0.001*              |                     |
| 40      | FT              | 0.60±0.02              | <0.001*              | <0.001*             | 0.71±0.02      | <0.001*              | <0.001*             |
|         | DN              | 0.54±0.02              | <0.001*              |                     | 0.59±0.02      | <0.001*              |                     |
| 50      | FT              | 0.63±0.02              | <0.001*              | 0.549               | 0.71±0.02      | <0.001*              | 0.008*              |
|         | DN              | 0.62±0.02              | <0.001*              |                     | 0.67±0.02      | <0.001*              |                     |

**Supplementary Table 2:** Single timepoint FLAIR segmentation model performance with alternate deeper U-Net architecture. All sensitivity and PPV values are displayed as mean ± standard error. FT = fine-tuned, DN = de-novo, PPV = positive predictive value, p<sup>Default</sup> = p value from comparison with the default model, p<sup>Method</sup> = p value from comparison between fine-tuned and de-novo training methods with the same training dataset size. \* indicates statistical significance (p<0.05 after accounting for Bonferroni correction).
